# Supplementary material
Source: publisher figshare collection journal article supplement (https://tandf.figshare.com/ndownloader/files/14502395)
Supplement: Supplementary file 1 [file 14502395]

**Supporting Information**

**Aspergilolide, a steroid lactone produced by an endophytic fungus *Aspergillus sp*. MBL1612 isolated from *Paeonia ostii***

Pei-Liang Zhanga, Gang Wanga, b, Feng-Qing Xua, b, Jin-Song Liua, b, Ju-tao Wang a, b, Rui Zhanga, Hai-Tao Liua, Guo-Kai Wanga, b *, Pei-Yun Wua, b *

a*Anhui Key Laboratory of Modern Chinese Materia Medica, School of Pharmacy, Anhui University of Chinese Medicine, Hefei, PR. China*

b *Synergetic Innovation Center of Anhui Authentic Chinese Medicine Quality Improvement, Hefei 230012, PR. China*

* To whom correspondence should be addressed. E-mail: wanggk@ahtcm.edu.cn (G.-K. Wang); [peiyunwu@sina.com](mailto:peiyunwu@sina.com) (P.-Y. Wu)

Tel.: +86-551-68129167; Fax: +86-551-68129125

Address: School of Pharmacy, Anhui University of Chinese Medicine, Hefei, Anhui 230012, P.R.China.

**Abstract:** A new steroid lactone with unique skeleton aspergilolide (**1**), and 9 known compounds helvolic acid (**2**), verruculogen (**3**), tryprostatin B (**4**), 13-oxofumitremorgin B (**5**), fumitremorgin C (**6**), demethoxy fumitremorgin C (**7**), terezine D (**8**), aszonalenin (**9**), 12, 13- dihydroxy-fumitremorgin C (**10**) from cultures of the endophytic fungus *Aspergillus sp*. MBL1612. The structure of these compounds were elucidated through spectroscopic methods such as NMR and HRMS. All of the compounds were isolated from this genus for the first time. The cytotoxicity on five human cancer cell lines of new compound were detected.

**Key words:** Edophytic fungus; *Aspergillus sp*. MBL1612; Aspergilolide; Cytotoxicity

Table S1 1H NMR (500 MHz) and 13C NMR (125 MHz) data for compound **1** in CDCl3 P3

Fig S1 Key HMBC and COSY correlations of compound **1** P4

Fig S2 Key ROESY correlations of compound **1** P4

Fig S3 Chemical structures of compounds **2-10** P5

Fig S4 ORD of compound **1** P6

Fig S5 IR of compound **1** P6

Fig S6 UV of compound **1** P7

Fig S7 HRESIMS of compound **1** P8

Fig S8 1H NMR (500 MHz) spectrum of compound **1** in CDCl3 P9

Fig S9 13C NMR (125 MHz) spectrum of compound **1** in CDCl3 P9

Fig S10 HSQC spectrum of compound **1** in CDCl3 P10

Fig S11 1H-1H COSY spectrum of compound **1** in CDCl3 P10

Fig S12 HMBC spectrum of compound **1** in CDCl3 P11

Fig S13 ROESY spectrum of compound **1** in CDCl3 P11

**Table S1 1H NMR (500 MHz) and 13C NMR (125 MHz) data for compound 1 in CDCl3 (*J* in Hz)**

| Position | *δ*H | *δ*C |
| --- | --- | --- |
| 1 | 7.31 (d, 10.1) | 156.7 (d) |
| 2 | 5.88 (d,10.0) | 128.1 (d) |
| 3 | - | 201.2 (s) |
| 4 | 2.75 (m) | 40.5 (d) |
| 5 | 2.31 (dd, 12.4, 1.5) | 47.2 (d) |
| 6 | 5.28 (d, 1.5) | 73.3 (d) |
| 7 | - | 208.5 (s) |
| 8 | - | 52.4 (s) |
| 9 | 2.57 (dd, 13.0, 3.2) | 42.1 (d) |
| 10 | - | 38.4 (s) |
| 11 | 2.23 (m) | 23.9 (t) |
| 12 | 2.01 (m) | 22.1 (t) |
|  | 1.81 (dd, 12.8, 3.5) |  |
| 13 | 2.95 (dd, 12.7, 3.2) | 43.5 (d) |
| 14 | - | 53.1 (s) |
| 15 | 2.48 (m) | 36.5 (t) |
|  | 1.76 (m) |  |
| 16 | 4.93 (dd, 10.9, 4.0) | 81.6 (d) |
| 17 | - | 167.3 (s) |
| 18 | - | 125.2 (s) |
| 19 | - | 176.1 (s) |
| 20 | 0.82 (s) | 20.4 (q) |
| 21 | 1.42 (s) | 27.7 (q) |
| 22 | 2.38 (m) | 24.3 (t) |
| 23 | 2.23 (m) | 27.4 (t) |
| 24 | 5.11 (m) | 123.2 (d) |
| 25 | - | 133.2 (s) |
| 26 | 1.68 (s) | 25.8 (q) |
| 27 | 1.60 (s) | 18.0 (q) |
| 28 | 1.29(d, 6.9) | 13.3 (q) |
| 29 | 1.31 (s) | 18.4 (q) |
| 30 | - | 168.9 (s) |
| 31 | 2.11 (s) | 20.9 (q) |

1H-1H COSY HMBC

**Fig S1** Key HMBC and COSY correlations of compound **1**

**Fig S2** Key ROESY correlations of compound **1**

**Fig S3** Chemical structures of compounds **2-10**

**Fig S4** ORD of compound **1**

**Fig S5** IR of compound **1**

**Fig S6** UV of compound **1**

**Fig S7** HRESIMS of compound **1**

**Fig S8** 1H NMR (500 MHz) spectrum of compound **1** in CDCl3

**Fig S9** 13C NMR (125 MHz) spectrum of compound **1** in CDCl3

**Fig** **S10** HSQC spectrum of compound **1** in CDCl3

**Fig S11** 1H-1H COSY spectrum of compound **1** in CDCl3

**Fig** **S12** HMBC spectrum of compound **1** in CDCl3

**Fig** **S13** ROESY spectrum of compound **1** in CDCl3
